# Supplementary material for: Digital workflow optimization of van der Waals methods for improved halide perovskite solar materials
Source: Royal Society of Chemistry journal article supplement (doi:10.1039/d4dd00312h), 2025-01-01
Supplement: d4dd00312h1.pdf [file d4dd00312h1.pdf]

# Supporting Information: Digital Workflow Optimization of van der Waals Methods for Improved Halide Perovskite Solar Materials

Celso R. C. Rêgo,<sup>\*,†</sup> Maurício J. Piotrowski,<sup>‡</sup> Wolfgang Wenzel,<sup>†</sup> Alexandre C. Dias,<sup>¶</sup> Carlos Maciel de Oliveira Bastos,<sup>§</sup> Luís Octavio de Araújo,<sup>||</sup> and Diego Guedes-Sobrinho<sup>||</sup>

<sup>†</sup>*Institute of Nanotechnology Hermann-von-Helmholtz-Platz, Karlsruhe Institute of Technology,  
76021 Karlsruhe, Germany*

<sup>‡</sup>*Department of Physics, Federal University of Pelotas, PO Box 354, 96010-900, Pelotas, RS, Brazil*

<sup>¶</sup>*Physical Institute, University of Brasília, Brasília, DF, 70919-970, Brazil*

<sup>§</sup>*São Carlos Institute of Physics, University of São Paulo, 13566-590, São Carlos-SP, Brazil*

<sup>||</sup>*Chemistry Department, Federal University of Paraná, CEP 81531-980, Curitiba, Brazil*

E-mail: celso.rego@kit.edu

**Table S1: Ionic radii ( $r_{ion}$ ) for the X (N, P, As, and Sb), I, and Pb chemical elements, considering the respective charge state (CS) and coordination number (CN), from the literature.<sup>1,2</sup>**

| Element (Z) | Ion       | CS | CN | $r_{ion}$ (pm) |
|-------------|-----------|----|----|----------------|
| N (7)       | $N^{-3}$  | -3 | 4  | 146            |
| P (15)      | $P^{-3}$  | -3 | 4  | 212            |
| As (33)     | $As^{-3}$ | -3 | 4  | 222            |
| Sb (51)     | $Sb^{-3}$ | -3 | 4  | 245            |
| I (53)      | $I^{-1}$  | -1 | 6  | 220            |
| Pb (82)     | $Pb^{+2}$ | 2  | 6  | 119            |

**Table S2: Pauling electronegativity for the chemical elements involved in the  $XH_4PbI_3$  and  $CH_3XH_3PbI_3$  (X = N, P, As, and Sb) constitution, from the literature.<sup>3</sup>**

|                   | H    | C    | N    | P    | As   | Sb   | I    | Pb   |
|-------------------|------|------|------|------|------|------|------|------|
| Atomic number     | 1    | 6    | 7    | 15   | 33   | 51   | 53   | 82   |
| Electronegativity | 2.20 | 2.55 | 3.04 | 2.19 | 2.18 | 2.05 | 2.66 | 1.80 |

**Table S3: For  $\text{XH}_4\text{PbI}_3$ : the tolerance factor,  $t$ , is obtained from the X–H average bond lengths,  $d_{av,\text{X-H}}$ , and the ionic radii of  $\text{XH}_4^+$ ,  $r_{\text{XH}_4}$  (estimated by  $r_{\text{XH}_4} = \sqrt{2}d_{av,\text{X-H}}$ ). For  $\text{CH}_3\text{XH}_3\text{PbI}_3$ : the  $t$  factor is obtained by two ways: (i) from the C–X bond lengths,  $d_{\text{C-X}}$ , and the ionic radii of  $\text{CH}_3\text{XH}_3^+$ ,  $r_{\text{CH}_3\text{XH}_3}$  (estimated by  $r_{\text{CH}_3\text{XH}_3} = 0.5d_{\text{C-X}} + r_{\text{X,ion}}$ ); and (ii) from the distance between the center of mass (CM) of the molecule and the atom with the largest distance to CM, except the H atoms,  $d_{\text{CM}}$ , and the ionic radii of  $\text{CH}_3\text{XH}_3^+$ ,  $r_{\text{CH}_3\text{XH}_3}$  (estimated by  $r_{\text{CH}_3\text{XH}_3} = d_{\text{CM}} + r_{\text{X,ion}}$ ). For both sets, X = N, P, As, and Sb, and all structures are optimized within empirical (D2, D3, and D3BJ), semi-empirical (TS, TSSCS, MBD, and dDsC), and without (std.) vdW corrections.**

| System                                |                                    | std.   | D2     | D3     | D3BJ   | TS     | TSSCS  | MBD    | dDsC   |
|---------------------------------------|------------------------------------|--------|--------|--------|--------|--------|--------|--------|--------|
| $\text{NH}_4\text{PbI}_3$             | $d_{av,\text{N-H}}$ (pm)           | 104.25 | 104.27 | 104.13 | 104.29 | 104.52 | 103.81 | 103.87 | 103.80 |
|                                       | $r_{\text{NH}_4}$ (pm)             | 147.44 | 147.46 | 147.27 | 147.49 | 147.81 | 146.81 | 146.90 | 146.79 |
|                                       | $t$                                | 0.7664 | 0.7665 | 0.7661 | 0.7665 | 0.7672 | 0.7651 | 0.7653 | 0.7651 |
| $\text{PH}_4\text{PbI}_3$             | $d_{av,\text{P-H}}$ (pm)           | 142.31 | 141.94 | 142.27 | 142.36 | 141.96 | 142.09 | 142.31 | 142.12 |
|                                       | $r_{\text{PH}_4}$ (pm)             | 201.26 | 200.73 | 201.20 | 201.33 | 200.76 | 200.95 | 201.26 | 200.99 |
|                                       | $t$                                | 0.8787 | 0.8776 | 0.8786 | 0.8788 | 0.8776 | 0.8780 | 0.8787 | 0.8781 |
| $\text{AsH}_4\text{PbI}_3$            | $d_{av,\text{As-H}}$ (pm)          | 152.20 | 151.51 | 151.88 | 152.19 | 151.77 | 152.02 | 152.20 | 151.84 |
|                                       | $r_{\text{AsH}_4}$ (pm)            | 215.24 | 214.26 | 214.78 | 215.22 | 214.64 | 214.99 | 215.24 | 214.73 |
|                                       | $t$                                | 0.9078 | 0.9058 | 0.9069 | 0.9078 | 0.9066 | 0.9073 | 0.9078 | 0.9068 |
| $\text{SbH}_4\text{PbI}_3$            | $d_{av,\text{Sb-H}}$ (pm)          | 170.41 | 169.85 | 170.37 | 170.48 | 169.96 | 170.09 | 169.70 | 169.31 |
|                                       | $r_{\text{SbH}_4}$ (pm)            | 241.00 | 240.21 | 240.93 | 241.10 | 240.36 | 240.54 | 240.00 | 239.44 |
|                                       | $t$                                | 0.9616 | 0.9599 | 0.9614 | 0.9618 | 0.9602 | 0.9606 | 0.9595 | 0.9583 |
| System (by (i))                       |                                    | std.   | D2     | D3     | D3BJ   | TS     | TSSCS  | MBD    | dDsC   |
| $\text{CH}_3\text{NH}_3\text{PbI}_3$  | $d_{\text{C-N}}$ (pm)              | 149.11 | 149.32 | 148.97 | 148.96 | 149.10 | 149.02 | 148.97 | 148.87 |
|                                       | $r_{\text{CH}_3\text{NH}_3}$ (pm)  | 220.56 | 220.66 | 220.49 | 220.48 | 220.55 | 220.51 | 220.49 | 220.43 |
|                                       | $t$                                | 0.9189 | 0.9192 | 0.9188 | 0.9188 | 0.9189 | 0.9188 | 0.9188 | 0.9187 |
| $\text{CH}_3\text{PH}_3\text{PbI}_3$  | $d_{\text{C-P}}$ (pm)              | 179.49 | 179.45 | 179.43 | 179.50 | 179.21 | 179.21 | 179.42 | 179.23 |
|                                       | $r_{\text{CH}_3\text{PH}_3}$ (pm)  | 301.74 | 301.72 | 301.72 | 301.75 | 301.61 | 301.60 | 301.71 | 301.61 |
|                                       | $t$                                | 1.0883 | 1.0882 | 1.0882 | 1.0883 | 1.0880 | 1.0880 | 1.0882 | 1.0880 |
| $\text{CH}_3\text{AsH}_3\text{PbI}_3$ | $d_{\text{C-As}}$ (pm)             | 192.80 | 192.82 | 192.64 | 192.54 | 192.62 | 192.56 | 192.77 | 192.45 |
|                                       | $r_{\text{CH}_3\text{AsH}_3}$ (pm) | 318.40 | 318.41 | 318.32 | 318.27 | 318.31 | 318.28 | 318.38 | 318.22 |
|                                       | $t$                                | 1.1230 | 1.1230 | 1.1228 | 1.1228 | 1.1228 | 1.1228 | 1.1230 | 1.1227 |
| $\text{CH}_3\text{SbH}_3\text{PbI}_3$ | $d_{\text{C-Sb}}$ (pm)             | 212.23 | 212.42 | 211.72 | 211.78 | 211.46 | 211.84 | 211.84 | 211.71 |
|                                       | $r_{\text{CH}_3\text{SbH}_3}$ (pm) | 351.11 | 351.21 | 350.86 | 350.89 | 350.73 | 350.92 | 350.92 | 350.86 |
|                                       | $t$                                | 1.2659 | 1.2662 | 1.2654 | 1.2655 | 1.2651 | 1.2655 | 1.2655 | 1.2654 |
| System (by (ii))                      |                                    | std.   | D2     | D3     | D3BJ   | TS     | TSSCS  | MBD    | dDsC   |
| $\text{CH}_3\text{NH}_3\text{PbI}_3$  | $d_{\text{CM}}$ (pm)               | 78.64  | 79.44  | 79.25  | 79.24  | 78.64  | 78.62  | 78.58  | 78.53  |
|                                       | $r_{\text{CH}_3\text{NH}_3}$ (pm)  | 224.64 | 225.44 | 225.25 | 225.24 | 224.64 | 224.62 | 224.58 | 224.53 |
|                                       | $t$                                | 0.9275 | 0.9291 | 0.9287 | 0.9287 | 0.9275 | 0.9274 | 0.9273 | 0.9272 |
| $\text{CH}_3\text{PH}_3\text{PbI}_3$  | $d_{\text{CM}}$ (pm)               | 111.97 | 111.98 | 111.96 | 111.98 | 111.84 | 111.83 | 111.94 | 111.84 |
|                                       | $r_{\text{CH}_3\text{PH}_3}$ (pm)  | 323.97 | 323.98 | 323.96 | 323.98 | 323.84 | 323.83 | 323.94 | 323.84 |
|                                       | $t$                                | 1.1346 | 1.1347 | 1.1346 | 1.1347 | 1.1344 | 1.1344 | 1.1346 | 1.1344 |
| $\text{CH}_3\text{AsH}_3\text{PbI}_3$ | $d_{\text{CM}}$ (pm)               | 102.77 | 102.81 | 102.71 | 102.62 | 102.47 | 102.44 | 102.55 | 102.38 |
|                                       | $r_{\text{CH}_3\text{AsH}_3}$ (pm) | 324.77 | 324.81 | 324.71 | 324.62 | 324.47 | 324.44 | 324.55 | 324.38 |
|                                       | $t$                                | 1.1363 | 1.1364 | 1.1362 | 1.1360 | 1.1357 | 1.1356 | 1.1358 | 1.1355 |
| $\text{CH}_3\text{SbH}_3\text{PbI}_3$ | $d_{\text{CM}}$ (pm)               | 70.40  | 70.50  | 70.13  | 70.16  | 69.99  | 70.20  | 70.20  | 70.22  |
|                                       | $r_{\text{CH}_3\text{AsH}_3}$ (pm) | 315.40 | 315.50 | 315.13 | 315.16 | 314.99 | 315.20 | 315.20 | 315.22 |
|                                       | $t$                                | 1.1168 | 1.1170 | 1.1162 | 1.1163 | 1.1159 | 1.1163 | 1.1163 | 1.1164 |

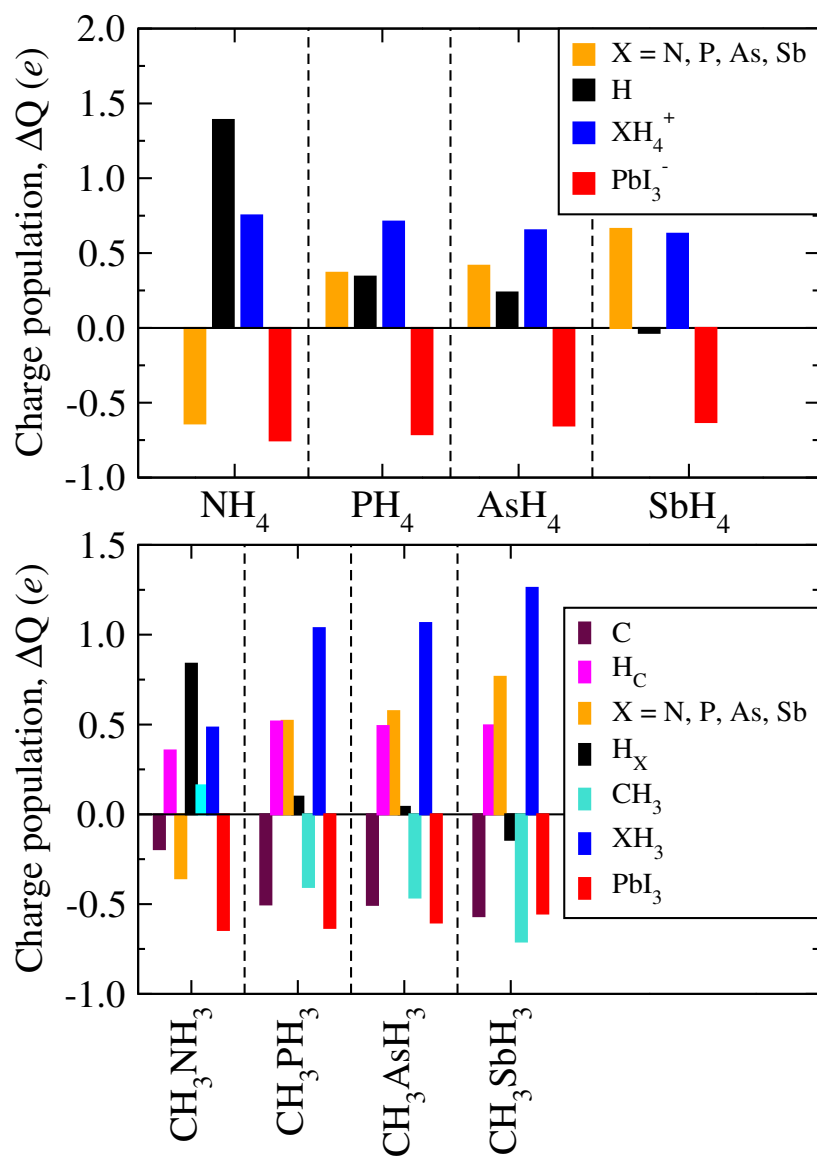

Figure S1: Partial charges computed for X (N, P, As, Sb), C,  $\text{H}_\text{C}$ ,  $\text{H}_\text{X}$ ,  $\text{XH}_4$ ,  $\text{CH}_3$ ,  $\text{XH}_3$ , and  $\text{PbI}_3$  via density-derived electrostatic and chemical (DDEC6) method for the  $\text{XH}_4\text{PbI}_3$  and  $\text{CH}_3\text{XH}_3\text{PbI}_3$  MHPs.

The figure below illustrates the evaluation of various perovskite structures' structural distortion and electronic properties. The distortion in the perovskite octahedral unit is quantified using the Baur distortion index ( $D_i$ )<sup>4,5</sup>, defined by  $D_i = \frac{1}{6} \sum_{i=1}^6 \left( \frac{|b_i - \bar{b}|}{\bar{b}} \right)$ , where  $b_i$  represents the individual Pb bond lengths, and  $\bar{b}$  is the average bond length across six bonds in the octahedron. A higher  $D_i$  value indicates significant distortion from an ideal symmetric octahedral configuration. The left side of the figure shows the  $D_i$  values calculated using different van der Waals (vdW) corrections for various perovskite structures, revealing that the degree of structural distortion is relatively low in these cases. The right side presents the corresponding band gap values (eV), reflecting variations in electronic properties across these structures and computational methods. The distortion index  $D_i$  supports the conclusion that Pb bonds do not play a major role in determining the band gaps of these materials, which is consistent with the lack of a clear trend between the  $D_i$  values and band gaps, suggesting that other factors, primarily the properties of the organic cations, dominate the band gap behavior in these systems.

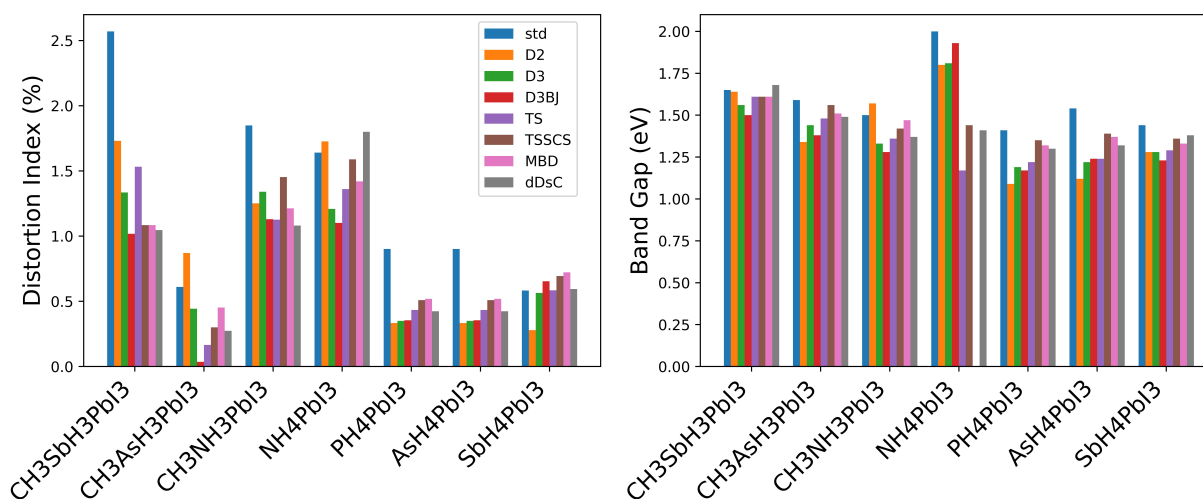

Figure S2: Bar plots comparing the distortion index (%) and band gap (eV) for various structures with different computational methods based on DFT-1/2+SOC. The left plot shows the distortion index, while the right plot displays the corresponding band gap values. Each bar group represents a specific structure (e.g., CH<sub>3</sub>SbH<sub>3</sub>PbI<sub>3</sub>, CH<sub>3</sub>AsH<sub>3</sub>PbI<sub>3</sub>, CH<sub>3</sub>NH<sub>3</sub>PbI<sub>3</sub>, NH<sub>4</sub>PbI<sub>3</sub>, PH<sub>4</sub>PbI<sub>3</sub>, AsH<sub>4</sub>PbI<sub>3</sub>, and SbH<sub>4</sub>PbI<sub>3</sub>), and the bars within each group correspond to distinct methods, such as standard (std), D2, D3, D3BJ, TS, TSSCS, MBD, and dDSc.

**Table S4: Equatorial (equat.) and apical (api.) Pb–I bonds and Pb–I–Pb angles as local structure parameters for  $\text{XH}_4\text{PbI}_3$  ( $\text{X} = \text{N}, \text{P}, \text{As},$  and  $\text{Sb}$ ) perovskites obtained within empirical (D2, D3, and D3BJ), semi-empirical (TS, TSSCS, MBD, and dDsC), and without (std.) vdW corrections. The unit cell’s  $\alpha, \beta,$  and  $\gamma$  angles are indicated for every calculation mode.**

| Sys.                       | vdW                        | Pb–I bond (Å) |           | Pb–I–Pb angle (deg) |         | Unit cell (deg) |         |          |
|----------------------------|----------------------------|---------------|-----------|---------------------|---------|-----------------|---------|----------|
|                            |                            | equat.        | api.      | equat.              | api.    | $\alpha$        | $\beta$ | $\gamma$ |
| $\text{NH}_4\text{PbI}_3$  | std.                       | 3.18–3.20     | 3.19–3.19 | 155–179             | 155–155 | 90              | 90      | 90       |
|                            | D2                         | 3.13–3.15     | 3.14–3.15 | 158–180             | 158–158 | 90              | 90      | 90       |
|                            | D3                         | 3.13–3.15     | 3.15–3.15 | 158–180             | 158–158 | 90              | 90      | 90       |
|                            | D3BJ                       | 3.14–3.15     | 3.14–3.16 | 154–178             | 154–154 | 90              | 90      | 91       |
|                            | TS                         | 3.07–3.17     | 3.16–3.16 | 169–179             | 179–179 | 90              | 90      | 89       |
|                            | TSSCS                      | 3.12–3.23     | 3.15–3.15 | 169–179             | 179–179 | 90              | 90      | 89       |
|                            | MBD                        | 3.10–3.21     | 3.13–3.13 | 167–179             | 178–178 | 90              | 90      | 89       |
|                            | dDsC                       | 3.11–3.20     | 3.12–3.12 | 167–179             | 178–178 | 90              | 90      | 89       |
|                            | $\text{PH}_4\text{PbI}_3$  | std.          | 3.16–3.19 | 3.19–3.19           | 175–180 | 175–175         | 90      | 90       |
| D2                         |                            | 3.09–3.11     | 3.11–3.11 | 180–180             | 180–180 | 90              | 90      | 90       |
| D3                         |                            | 3.11–3.13     | 3.13–3.13 | 178–180             | 177–177 | 90              | 90      | 90       |
| D3BJ                       |                            | 3.10–3.12     | 3.12–3.12 | 176–180             | 176–176 | 90              | 90      | 90       |
| TS                         |                            | 3.10–3.16     | 3.14–3.14 | 179–180             | 179–179 | 90              | 90      | 90       |
| TSSCS                      |                            | 3.14–3.18     | 3.18–3.18 | 176–179             | 176–176 | 90              | 90      | 90       |
| MBD                        |                            | 3.12–3.15     | 3.15–3.16 | 173–180             | 173–173 | 90              | 90      | 90       |
| sDsC                       |                            | 3.12–3.15     | 3.15–3.15 | 175–179             | 174–174 | 90              | 90      | 90       |
| $\text{AsH}_4\text{PbI}_3$ |                            | std.          | 3.16–3.21 | 3.20–3.22           | 172–178 | 169–169         | 90      | 90       |
|                            | D2                         | 3.09–3.12     | 3.10–3.12 | 178–179             | 180–180 | 90              | 90      | 90       |
|                            | D3                         | 3.10–3.15     | 3.14–3.15 | 178–180             | 177–177 | 90              | 90      | 90       |
|                            | D3BJ                       | 3.10–3.14     | 3.13–3.14 | 176–180             | 173–173 | 90              | 90      | 90       |
|                            | TS                         | 3.12–3.15     | 3.15–3.15 | 178–180             | 178–178 | 90              | 90      | 90       |
|                            | TSSCS                      | 3.13–3.20     | 3.19–3.19 | 174–178             | 175–178 | 90              | 90      | 90       |
|                            | MBD                        | 3.12–3.16     | 3.16–3.16 | 173–178             | 175–175 | 90              | 90      | 90       |
|                            | dDsC                       | 3.12–3.17     | 3.17–3.17 | 172–180             | 173–173 | 90              | 90      | 89       |
|                            | $\text{SbH}_4\text{PbI}_3$ | std.          | 3.17–3.21 | 3.21–3.21           | 179–180 | 179–179         | 90      | 90       |
| D2                         |                            | 3.09–3.13     | 3.12–3.12 | 169–180             | 169–169 | 90              | 90      | 90       |
| D3                         |                            | 3.12–3.16     | 3.16–3.16 | 175–180             | 175–175 | 90              | 90      | 90       |
| D3BJ                       |                            | 3.10–3.14     | 3.14–3.14 | 174–180             | 174–174 | 90              | 90      | 89       |
| TS                         |                            | 3.11–3.16     | 3.16–3.16 | 175–180             | 175–175 | 90              | 90      | 90       |
| TSSCS                      |                            | 3.14–3.19     | 3.19–3.19 | 176–180             | 178–178 | 90              | 90      | 90       |
| MBD                        |                            | 3.11–3.16     | 3.16–3.16 | 172–179             | 172–172 | 90              | 90      | 90       |
| dDsC                       |                            | 3.12–3.16     | 3.16–3.16 | 170–180             | 170–170 | 90              | 90      | 90       |

**Table S5: Equatorial (equat.) and apical (api.) Pb–I bonds and Pb–I–Pb angles as local structure parameters for  $\text{CH}_3\text{XH}_3\text{PbI}_3$  ( $\text{X} = \text{N}, \text{P}, \text{As}, \text{and Sb}$ ) perovskites obtained within empirical (D2, D3, and D3BJ), semi-empirical (TS, TSSCS, MBD, and dDsC), and without (std.) vdW corrections. The  $\alpha, \beta,$  and  $\gamma$  angles of the unit cell are indicated for every calculation mode.**

| Sys.                                  | vdW                                   | Pb–I bond (Å) |           | Pb–I–Pb angle (deg) |         | Unit cell (deg) |         |          |
|---------------------------------------|---------------------------------------|---------------|-----------|---------------------|---------|-----------------|---------|----------|
|                                       |                                       | equat.        | api.      | equat.              | api.    | $\alpha$        | $\beta$ | $\gamma$ |
| $\text{CH}_3\text{NH}_3\text{PbI}_3$  | std.                                  | 3.07–3.35     | 3.20–3.27 | 168–172             | 169–169 | 90              | 89      | 90       |
|                                       | D2                                    | 3.06–3.25     | 3.13–3.13 | 160–164             | 160–160 | 90              | 89      | 90       |
|                                       | D3                                    | 3.08–3.22     | 3.16–3.19 | 168–172             | 172–172 | 90              | 89      | 90       |
|                                       | D3BJ                                  | 3.07–3.20     | 3.15–3.18 | 168–172             | 172–172 | 90              | 90      | 90       |
|                                       | TS                                    | 3.06–3.30     | 3.18–3.21 | 170–174             | 169–169 | 90              | 88      | 90       |
|                                       | TSSCS                                 | 3.04–3.37     | 3.20–3.24 | 171–176             | 169–169 | 90              | 89      | 90       |
|                                       | MBD                                   | 3.06–3.30     | 3.19–3.23 | 166–171             | 170–170 | 90              | 89      | 90       |
|                                       | dDsC                                  | 3.10–3.23     | 3.18–3.21 | 168–172             | 171–171 | 90              | 89      | 90       |
|                                       | $\text{CH}_3\text{PH}_3\text{PbI}_3$  | std.          | 3.21–3.22 | 3.23–3.23           | 179–179 | 180–180         | 90      | 87       |
| D2                                    |                                       | 3.15–3.16     | 3.13–3.13 | 178–180             | 179–179 | 90              | 87      | 90       |
| D3                                    |                                       | 3.16–3.18     | 3.15–3.17 | 179–179             | 180–180 | 90              | 87      | 90       |
| D3BJ                                  |                                       | 3.15–3.16     | 3.15–3.16 | 179–179             | 180–180 | 90              | 88      | 90       |
| TS                                    |                                       | 3.18–3.20     | 3.19–3.19 | 180–180             | 180–180 | 90              | 86      | 90       |
| TSSCS                                 |                                       | 3.20–3.22     | 3.21–3.21 | 180–180             | 180–180 | 90              | 86      | 90       |
| MBD                                   |                                       | 3.18–3.20     | 3.18–3.18 | 180–180             | 180–180 | 90              | 86      | 90       |
| dDsC                                  |                                       | 3.18–3.20     | 3.17–3.17 | 180–180             | 180–180 | 90              | 86      | 90       |
| $\text{CH}_3\text{AsH}_3\text{PbI}_3$ |                                       | std.          | 3.19–3.26 | 3.24–3.25           | 177–177 | 177–177         | 90      | 86       |
|                                       | D2                                    | 3.13–3.18     | 3.14–3.14 | 178–178             | 180–180 | 90              | 84      | 90       |
|                                       | D3                                    | 3.14–3.22     | 3.16–3.20 | 177–178             | 179–179 | 90              | 85      | 90       |
|                                       | D3BJ                                  | 3.13–3.19     | 3.15–3.17 | 177–178             | 180–180 | 90              | 85      | 90       |
|                                       | TS                                    | 3.20–3.22     | 3.20–3.20 | 177–178             | 180–180 | 90              | 85      | 90       |
|                                       | TSSCS                                 | 3.21–3.23     | 3.23–3.23 | 180–180             | 180–180 | 90              | 86      | 90       |
|                                       | MBD                                   | 3.19–3.21     | 3.20–3.20 | 180–180             | 180–180 | 90              | 85      | 90       |
|                                       | dDsC                                  | 3.19–3.21     | 3.19–3.19 | 180–180             | 180–180 | 90              | 85      | 90       |
|                                       | $\text{CH}_3\text{SbH}_3\text{PbI}_3$ | std.          | 3.26–3.30 | 3.25–3.25           | 176–178 | 177–177         | 90      | 86       |
| D2                                    |                                       | 3.16–3.21     | 3.10–3.23 | 171–175             | 165–165 | 90              | 83      | 90       |
| D3                                    |                                       | 3.20–3.26     | 3.14–3.23 | 174–180             | 173–173 | 90              | 84      | 90       |
| D3BJ                                  |                                       | 3.18–3.23     | 3.13–3.19 | 174–179             | 173–173 | 90              | 84      | 90       |
| TS                                    |                                       | 3.14–3.30     | 3.14–3.26 | 175–179             | 171–171 | 90              | 84      | 90       |
| TSSCS                                 |                                       | 3.19–3.26     | 3.17–3.23 | 170–177             | 174–174 | 90              | 85      | 90       |
| MBD                                   |                                       | 3.19–3.26     | 3.17–3.23 | 170–177             | 174–174 | 90              | 85      | 90       |
| dDsC                                  |                                       | 3.18–3.25     | 3.16–3.23 | 171–172             | 168–168 | 90              | 84      | 90       |

## References

- (1) Pauling, L. *The Nature of the Chemical Bond*; Cornell University Press: Ithaca, 1960.
- (2) Shannon, R. D. Revised effective ionic radii and systematic studies of interatomic distances in halides and chalcogenides. *Acta Crystallogr., Sect. A: Found. Crystallogr.* **1976**, *32*, 751–767.
- (3) Haynes, W. M. *CRC Handbook of Chemistry and Physics, 95th Edition*; Taylor & Francis Group, 2014.
- (4) Baur, W. H. The geometry of polyhedral distortions. Predictive relationships for the phosphate group. *Acta Crystallographica Section B Structural Crystallography and Crystal Chemistry* **1974**, *30*, 1195–1215.
- (5) Morteza Najarian, A.; Dinic, F.; Chen, H.; Sabatini, R.; Zheng, C.; Lough, A.; Maris, T.; Saidaminov, M. I.; García de Arquer, F. P.; Voznyy, O.; Hoogland, S.; Sargent, E. H. Homomeric chains of intermolecular bonds scaffold octahedral germanium perovskites. *Nature* **2023**, *620*, 328–335.
